# Supplementary material
Source: Springer Nature journal article supplement (https://www.springermedizin.de/resource/supplementary/12884_2012_555_MOESM2_ESM.pdf/9457958)
Supplement: MOESM2 [file 9457958]

Introduction

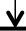

Eligibility & Consent

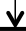

Risk Assessment

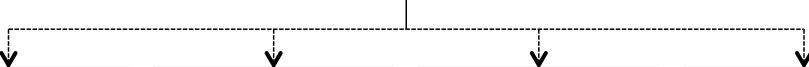

Real Life Scenario  
Low Risk –  
No Previous

Real Life Scenario  
Low Risk –  
Previous

Real Life Scenario  
High Risk –  
No Previous

Real Life Scenario  
High Risk –  
Previous

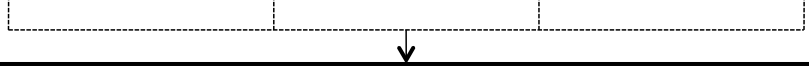

Hypothetical Scenarios

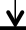

Visual Analog Scale (Feeling Thermometer)

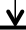

Probability Trade-Off (PTO)

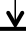

Summary of Responses

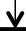

Understanding
